# Supplementary material for: Sub-10 nm Ta Channel Responsible for Superior Performance of a HfO2 Memristor
Source: PubMed Central journal article supplement (PMC4917839; doi:10.1038/srep28525), 2016-06-23
Supplement: srep28525-s1.pdf [file srep28525-s1.pdf]

## Supplementary Information

# **Sub-10 nm Ta Channel Responsible for Superior Performance of a HfO<sub>2</sub> Memristor**

Hao Jiang<sup>1</sup>, Lili Han<sup>1,2</sup>, Peng Lin<sup>1</sup>, Zhongrui Wang<sup>1,3</sup>, Moon Hyung Jang<sup>1,3</sup>, Qing Wu<sup>4</sup>,

Mark Barnell<sup>4</sup>, J. Joshua Yang<sup>3</sup>, Huolin Xin<sup>2</sup>, and Qiangfei Xia<sup>1\*</sup>

<sup>1</sup> Nanodevices and Integrated Systems Laboratory, Department of Electrical and Computer Engineering, University of Massachusetts, Amherst, MA 01003, USA.

<sup>2</sup> Center for Functional Nanomaterials, Brookhaven National Laboratory, NY 11973, USA.

<sup>3</sup> Ionic and Electronic Device and Materials Lab, Department of Electrical and Computer Engineering, University of Massachusetts, Amherst, MA 01003, USA.

<sup>4</sup> Air Force Research Laboratory, Information Directorate, Rome, NY 13441, USA.

\*E-mail: [qxia@ecs.umass.edu](mailto:qxia@ecs.umass.edu)

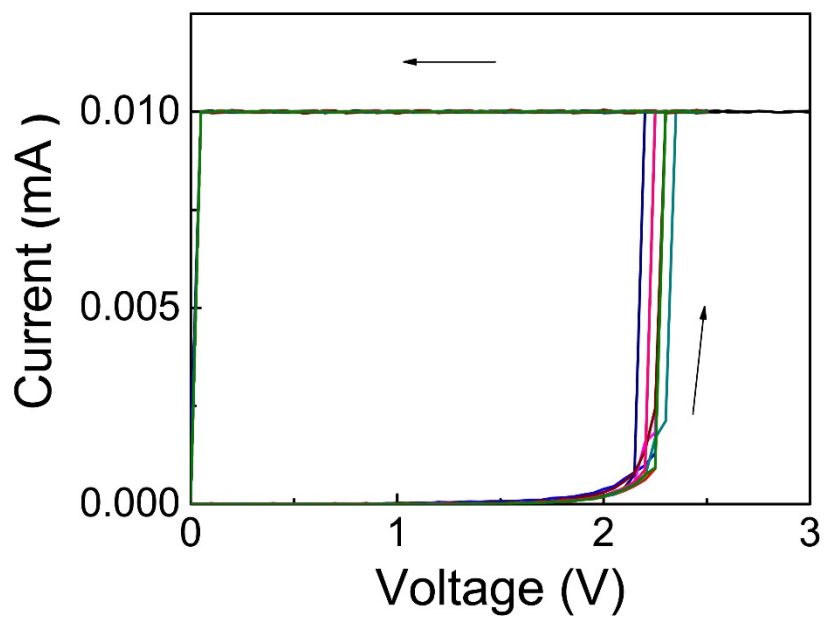

**Figure S1.** Typical I-V curves for the electroforming process from 10 randomly chosen Ta/HfO<sub>2</sub>/Pt devices. The forming voltages are around 2.2 V. After the forming process, the devices stay at ON state.

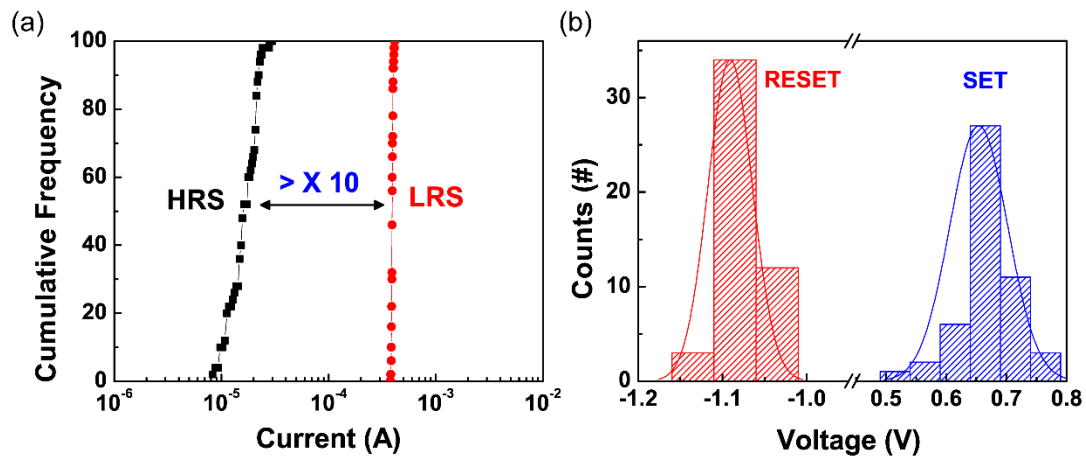

**Figure S2.** (a) Distributions of both LRS and HRS resistances from 50 consecutive DC sweeps. The window is kept  $> 10 \times$ . (d) Statistics of SET and RESET voltages, which are normally distributed around 0.65 V and -1.1 V separately. Device size:  $10 \times 10 \mu\text{m}^2$ .

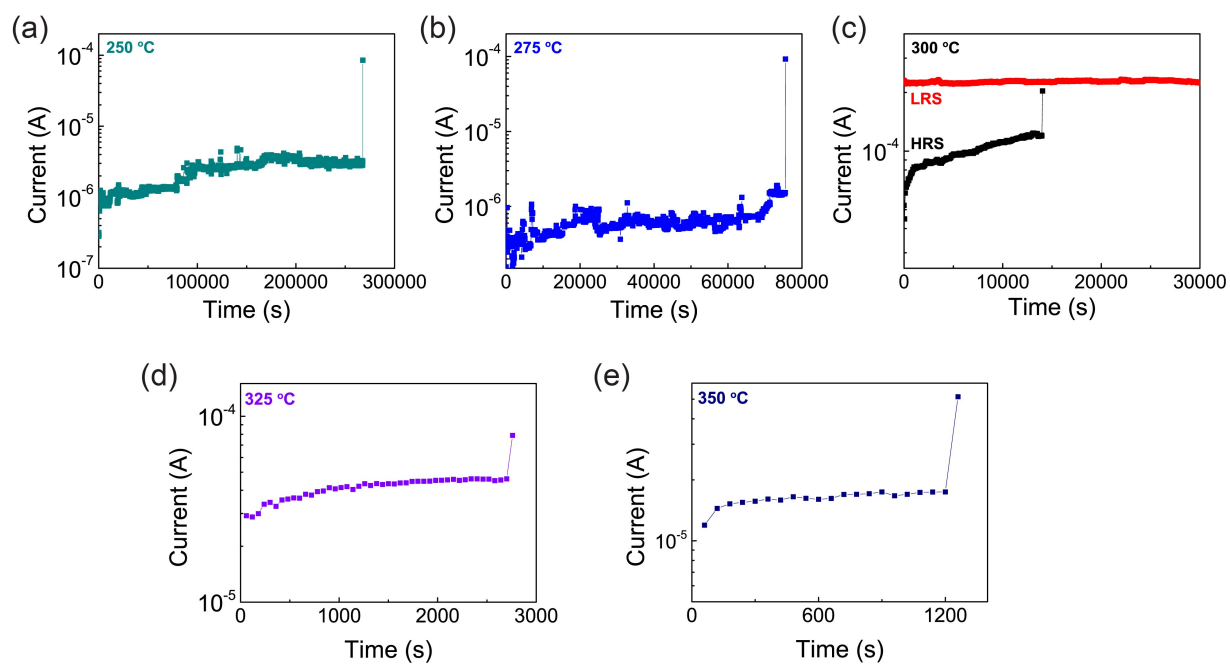

**Figure S3.** Retention measurements of the device at (a) HRS at 250 °C, (b) HRS at 275 °C, (c) LRS and HRS at 300 °C, (d) HRS at 325 °C and (e) HRS at 350 °C. The failure time for the HRS are  $2.7 \times 10^5$ ,  $7.5 \times 10^4$ ,  $1.4 \times 10^4$ ,  $2.7 \times 10^3$ , and  $1.3 \times 10^3$  s, respectively.

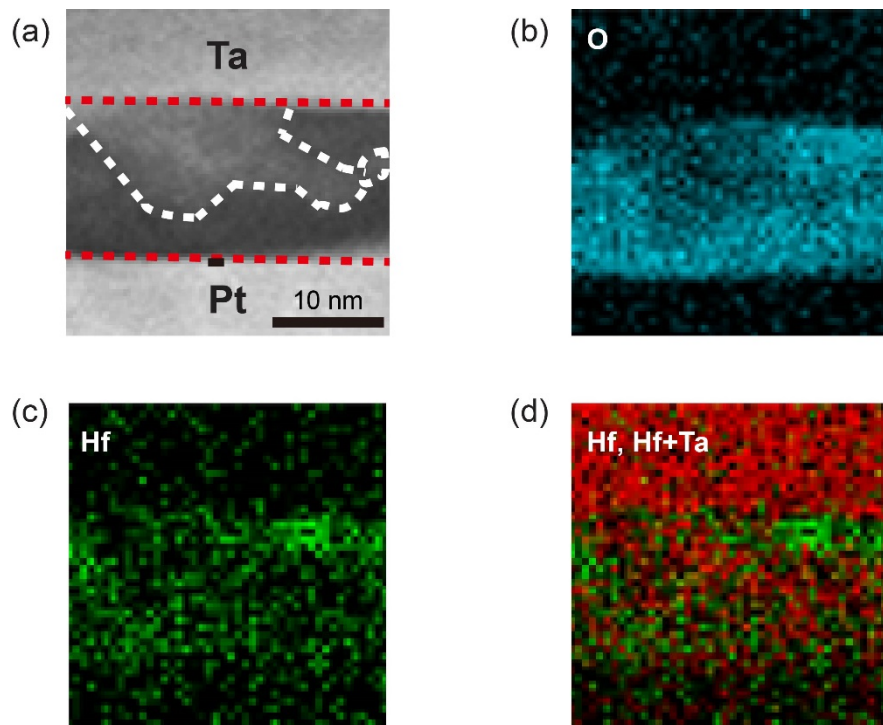

**Figure S4.** HAADF-STEM image and core-loss EELS mapping of an incomplete conduction channel. (a) HAADF-STEM image of an incomplete conduction channel. The EELS mapping results for (b) O, (c) Hf, (d) combination of Hf and Hf+Ta suggest the incomplete conduction channel is also Ta-rich and O-deficient.

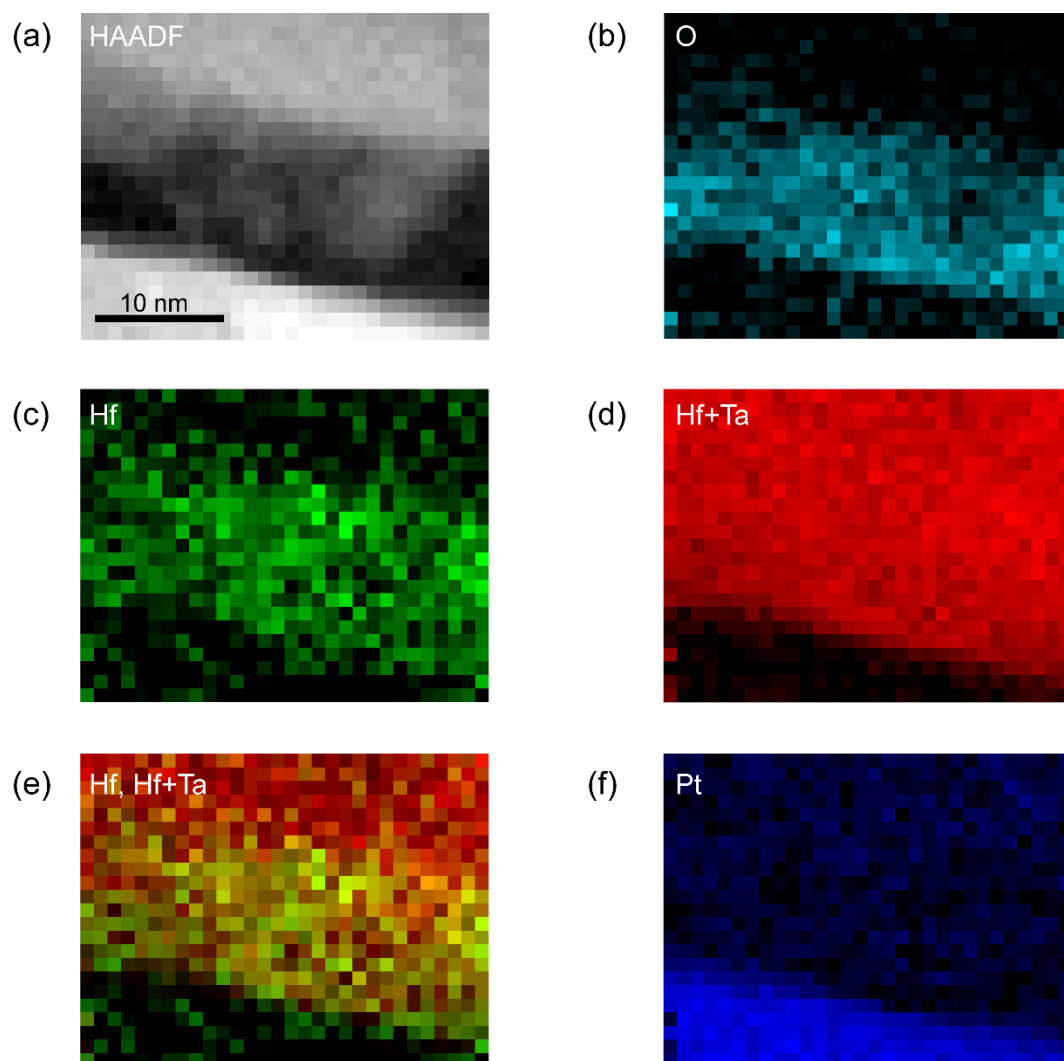

**Figure S5.** STEM-EELS mapping of the conduction channel area. (a) HAADF-STEM image of the mapped region generated during mapping. (b) The EELS mapping result for O, clearly shows the conduction channel region is oxygen-deficient. The EELS mapping results for (c) Hf, (d) Hf + Ta, (e) combination of Hf and Hf + Ta, and (f) Pt indicate the conduction channel contains more Ta, which is consistent with the brighter intensity of the conduction channel in (a).
